# Supplementary material for: Long Non-Coding RNA GDAR Regulates Ovine Granulosa Cells Apoptosis by Affecting the Expression of Apoptosis-Related Genes
Source: MDPI journal article supplement (doi:10.3390/ijms23095183), 2022-05-06
Supplement: s1 [file s1]

**Figure S1.** The significantly enriched GO terms of lncRNAs regarding cellular component. (A–C) GO categories (cellular component) of differential lncRNA target genes in different glucose treatment groups (CON versus LOW, CON versus HIGH and LOW versus HIGH).

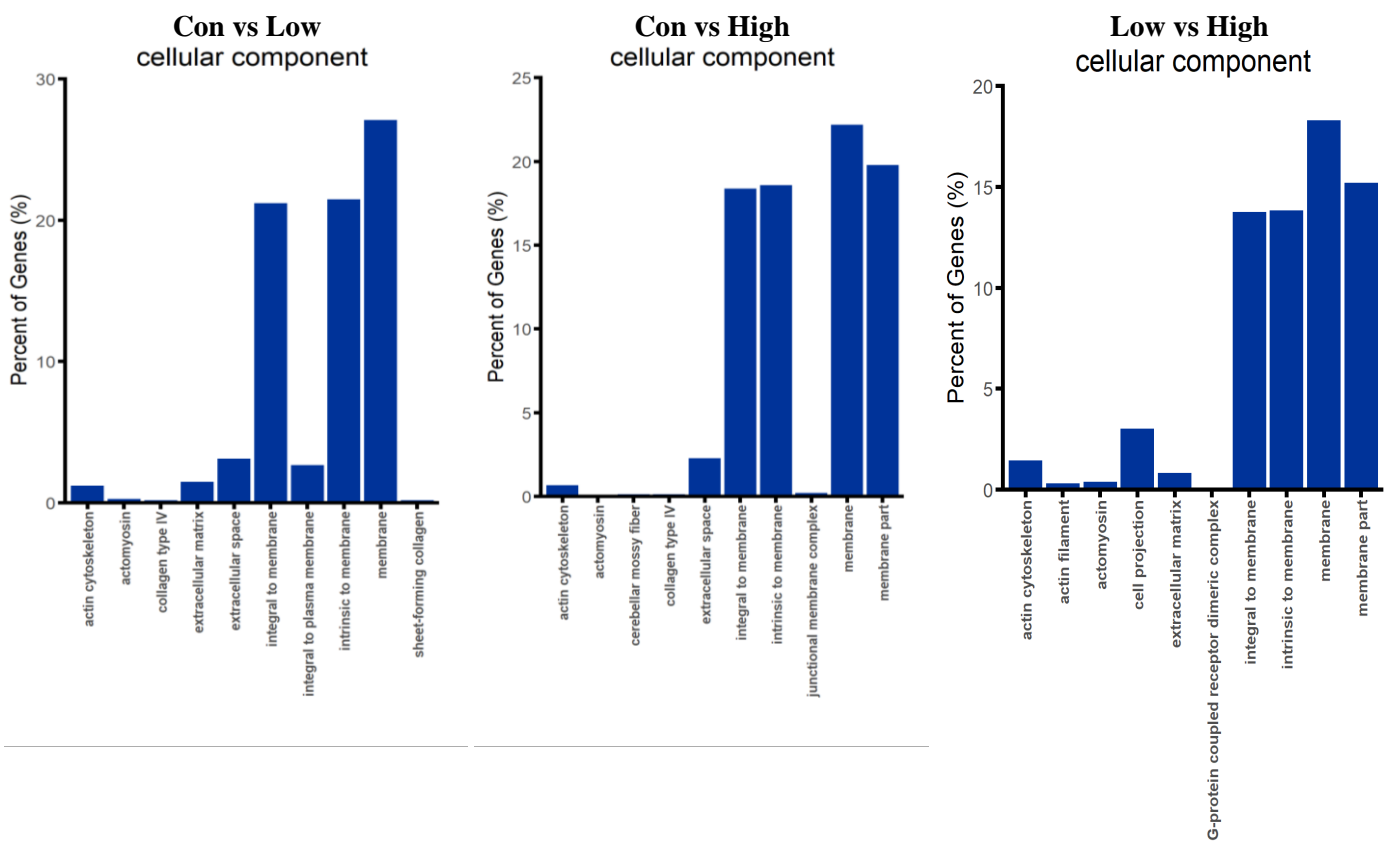

**Figure S2.** The significantly enriched GO terms of lncRNAs regarding molecular function. (A–C) GO categories (molecular function) of differential lncRNA target genes in different glucose treatment groups (CON versus LOW, CON versus HIGH and LOW versus HIGH).

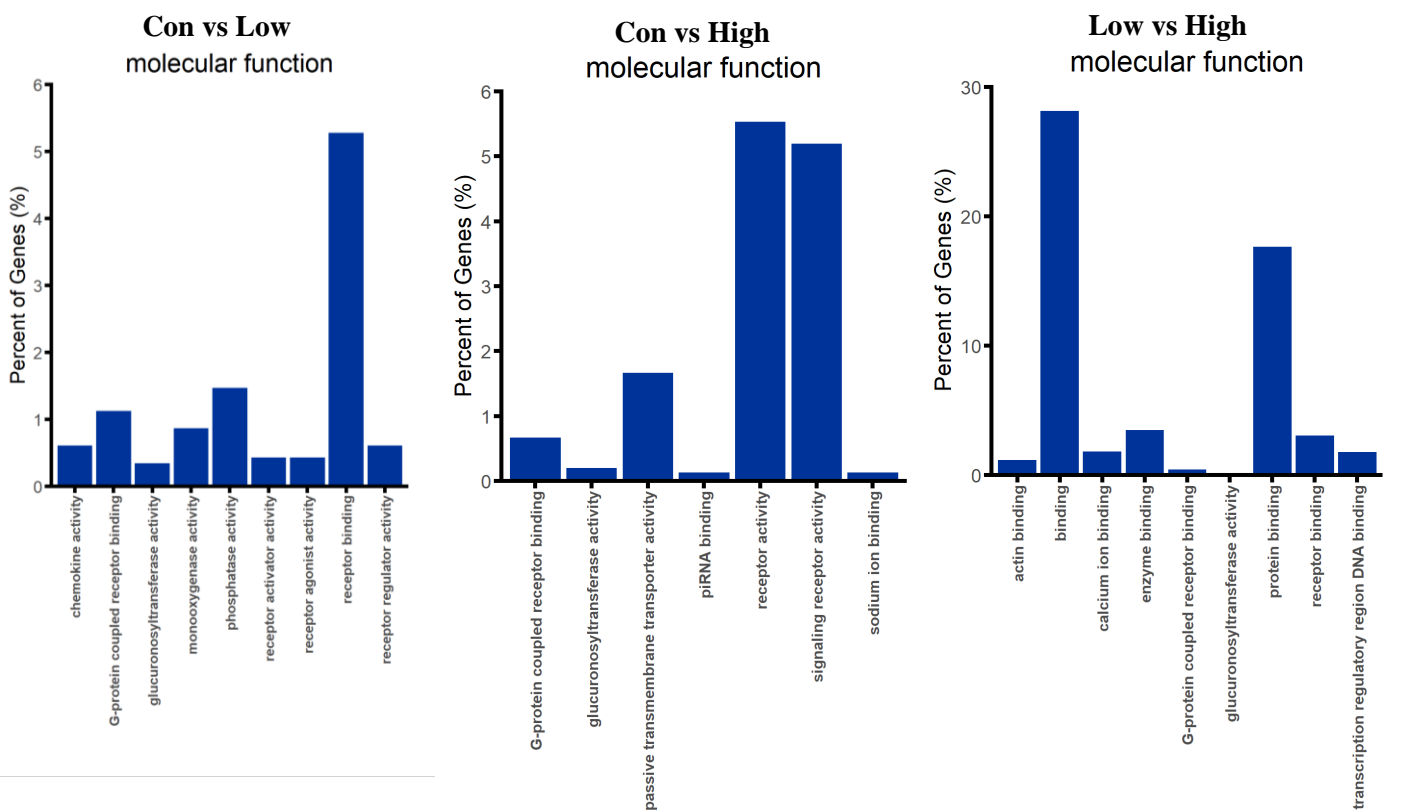

**Figure S3.** RNA sequence of TCONS\_00128966

TATATATATATAATATGTCCACCCACTGAGTGGGCAGGCCTTGGATGCTCTCTGGGGGCCAGG  
TCTCGCTGCCTGTATGCTCAGTCAGGTCTAACTCTTTGTGTCCCCATGGACTGTAACTCACC  
AAGCTTCCTCTGTCCATGGAATTTTCCAGGGAAGAATATTGGAGTGGGGTTGCCATTTCTAC  
TCCAGGGCATCTTCCTGACCCAGGGACTTAACGCCTCTCTCTTGCAAATCTCCTGCACCGGC  
AGGCAGGACTCTACTAACTGTGCCACCTGGGAAGCACTGGGGGACCAGGGTTGGGGGGGG  
GAGTGTTTATGGGGGAGGAATATCAAGCCAAGTAAGAAATTCTGCCCACTGCAGTTCCTA  
GGGGGCTAGAGTTCAGTGTGGAATTGTCTGTGGAATTCTCCAGGCAAGAATACTGGAGTGG  
GTAGACATTCCTTTCTCCGGAGGAATCTTCCCAACCCAGGGATCAAACCCAGGTCTCTCTAT  
ATTGCAAGCAGATGCTTTACTGTCTGAGCCACAAAGGAAGCTTCAGAGTTCAGTGTGGAAC  
TGCAGAAGCAGATATTTCTATTATGACTGTGATGAGCCTGTGAGGGGGGGTGATGAGCCGA  
GCCCCGCGGGTGTTCCTGAAGCCAGCCTCCTTTGTGTTGCCTGCCCGGGGGCTACTACACGTT  
GGGGGGTGGGGGCAACTCCCGGCCACGCCCTTCCTCACCTTTGTCTTGAGCCACATTGTTT  
TGCGCCTGTGGACCCTCATCAGCTGTTTCTGGCCCTCACACCCAGTTCCGTTGTTTCTTCC  
CCACGTTTTTCCCACTATGCCCCAGTTGCCTTGACACCTCTGCTTCTTCCTATAGCAAATGCC  
TAAGGATGATCACAGCTCACTTTTACAGGCTAAGCCACAGTTTACAAACCCTGTGGAGTGG  
GTCTAATATTATCCCCATTTTACAGGTGAGGAAACCAAGGCCAAGAGATTAAGTATGTAGCA  
TAAGGCCACAGTGGGGAAGGAAATAGCAATCCACTCCAGTATTCTTCCCTAAGGCCACAGA  
GCTAGGAGGTGATGGGCCTGGGGTTGAACCCGGGCAGTCTGGTTCCAGTCTGTCCTAGTAA  
CCACTGCACTAGGTTGACCTCTTAACCCGTCATTTTCTTTCCAGCTCTCAAACCCACATGTTT  
ATTCCCAGGCTTCCACACAGTAGGTGCCCATTAGAGGTTTGACAGATGAGTTTCGTCTTCCT  
ATCCTGCCTGCCTCGGCGTCACGCCTTGTACATTTGCCATTAATAAAGAAATGAATACGTGG  
GCTGACGAACAGACGAATAGATGATGCCACCTGTTGGTGTGTGTGGAAGCTGTAGTTACCA  
GCATTCTTCAGGGCAGAGGTGCAAGTTCGTAATGACTGGACAGGTTCTGAAATCATCCCCG  
TCGTTGGTGAATGCAGTTTTTGAAATAACGTTGTCACTATAATGTCCCTAGCCAACAGGAGGT  
AGTGTTTTTACTCTTCTATCAAAAGCCAAAGCCTCTTGGGGCATGGGACCTCCAAGGCTTG  
GGCTGGGGCTCTTATTTAAAAGCGAGGAGGAGAGTGTCTCCCCAGGCAGGTAGTTAGGAA  
GCCCATCCAGGGGTACTTGGAGATCAGAGCCAGCTTTTGGAGGATGAAAATGAGTTAAAAG  
TCTGGCCATGATAATTCCCTTATCTCTGACTTCCTGCCAGCACTCCTGACGTCTGAGCTGCTC  
AGAATCTGGGTGGCCTCTCTGCAGGGCTCTTGATGCAAAATGAGCCCCAGGTGTTGGGGAT  
AAAAAACCCACTGTTGGTTCATTACCACGCCCCCTCTTCTGGGCCACCCTGGGTGCCCTGGC  
TTTGTGGGGTTTTTCCCCCTCCAGCTCTGCTGATCTGCAGGCATATTTATTTGTAAGTGGAATTT  
TTCAAAGGGAAGCACTTTACAAATGATGAAAAGAAAACAACCTTGGGGTAAATGGCTCATCT  
GGCAATGGGAAACAGCCCCCTGGCATCCAGAGCTCTTTAACCTTGTCTGAACAGGCAGCAG  
GGAACCTTGGCTTCTGTATCATCTTACAGAAAATTTTTCTGTCTCCCTACTGAGGCCAGACCC  
TGGGGAGAAAGAGCGGAAAACCCAACCCAGGACCCTTGGAATAATTTGATAGGTGGGTGTC  
TCTCTACCCCATACGGTCAACCTGAGTGCCCTTCCTATCCAAGCCTCTGTGACTTCTGTCCC  
CAGATGATTCCATAGTTCTCTGCTTGTCTCCTGACTTCTGCCCCAGTCACTTCTGATGCTGCG  
GCCCACAGAAAGATCTAAAAATCAGAGTGGATCTGCTCCATTCCATCTGTGAACGAGGCCT  
CTGGTGCCCCGTGCACCCGCATAGAAGCCGCAGAATTAAAGCTGGTCTTACCAAGGCCTGC  
AGAGCCCCATGTGATCGGGCCCTTCTGTCTTTCTGGCCCCATTTCCTGCTGCAGCCACACTG  
GCCTCTTTGCAGTTCTCAGTTCTTCAAGCCTGTTTCTACCCAGGGCCTTTGCATCTGCCAT  
CCCCTCTGCCTGCCTCCCCACATCCTCCTGGTTCTCCCTCATTTGGCTGTGGGCTGTGCTCA  
GATAGCATCTTATCAATTGGGCCCTCCCTGTGGCCTTCTATAAAGTATCCCCCTTCTCTCTT  
GCCTGCACTCCCTGCCCCACCACCGTCAGCTTTAGGCTTGCTCCACAGTTATGGAGAAGGC  
ACTGGCACCCCACTCCAGTACTCTTGCTGGAAAACCCCATGGACGGAGGAGCCTGGTAG  
GCTGCAGTCCATGGGTTTCGCTGAGCATTGGATACGACTGAGCGACTTCCCTTTCACTTTTCA  
CTTTCATGCACTGGAGAAGGAAATGGCAACCCACTCCAGTGTTCTTGCCTGGAGAATCCCA  
CGGATGGAGGAGCCTGGTGGGCTGCCGTCTATGGGGTCGCACAGAGTCGGACACGACTGA  
AGCGACTTAGCAGCAGCAGCACAGTTATTATATATGTTATTTCTATGTTTCACTTTTTATAGTT  
ATTTATATGTTTCACTTTCTGTCTGTTACATCAAAATATACATCCGAATGTAAATGCCTTAAGG  
ACAAGGACTTTATTTACTTTTTGCTTTAGATACTTCTTTTTTAGGGGGCACATCACATATGGTCT  
ATCCATTCATCCTTTGATGGACATTTGGATGTTTTCCACCTTTTCACTGTTACAAATAATGCT  
GCTGCAAACTTTTTGTGTACAAGTGTATGTGAATGAGGAAAGCTTTGGTTGGACATCTTCA  
AGTCAGTTTACAGATGCTGTCTTTGAGGGGTATTCATGCCTGGAGCCATGTCCCAAATCTCC  
CAGTGGCTCCTGAACTCATTTGGTTTCAAATTATGATTGTATTTTAGAGAGCTGTGTTACTTA  
TCCCAGCAGGCATTTCTTTTGCTATAAGACTGATGTATTATTACTGTTTCCACTCTCTGTGTGA  
TTGGCTGGGTATCCCTTTAATGCTGCCACCTGCAATTCCTTTCTTTGTACAGACTAGTTAACA  
TCTTATTTGTTTGTTTATTTTTATTTTGAAGTGTGCTGGGTCTTTGTCTAAAGCTCAGTCTTCT  
CTAGTTGTGGCCCTTGGGCTTAGTTGTAGGATCTTATTTCCCTGACCAGGGATTGAACCTGA  
GTCCCCTGCATTGGCAGGTGAATTCCTTGACCACTGGACCACAGAGAAGTCCCCTAGTTACC  
CACCTGATGTCTCTTCCAGTTTTACTCTGCTCAGCTATGTGGCTTCATTTGACTCCATCCTCA  
GAACTGATTGTGTTTCTTTCTCCCTAGAGCTTCTCTTTTCTGAATGAAATTTGCCATCCTGCA  
CCAAGAACCCTCGACTCTAAGTGGATTTGTCTGAAACGTGATCTTTGAGTTTCGTCTCATTCC  
AGTCAACTTCTTTATCTCCTAATTGCATTACCCACGACCCAGTAGAATTCCAAAAAGCATT  
TATAGAAGATGCATTAAAGTTTGATTGCTGGTGAGGTTGTGATGACAAAGGCAGCCGCAGG  
GCTGCTCTGCCAAGTGCCAGGGTTTGAAGTCAAGGTAGCTTTTCTCCTTTGCCCGAAGGAA  
AGCATGGGCAGGTTTGCTCTGCAGGGCATCTGTAGCAGCAGCCAATCTTCTTGGAAGGAG  
AACTGAGGTGCAAAAGGCCAGCTTTTCATTCTGCTGTGAGGACACAAAGGAGGGTTTGT

TGAAAATATCTGTCAAAGGTGGGTGGGATTCCAGAGATCATCCATGTCTCACGTGATCAGAGCACC  
TTTTTAAAGATGAATGAATGAATTGATGCTTTTCTTTTTGGCTGCACTGGGTCTAAGTTACTGCATGT  
GAGCTTTCTCCAGTTACGGCAAACGAGGGGCTACTGGCTAGTTGCAGTGTGCGGGGCTGCTGCTTACA  
GTGGCTTCTCTTGCTGAGGAGCACGGGCGCTAGGCATGAGGAGCATGAGGAGCTAGGCACACTGG  
CTTTGGGAGTTGTGGCTCACAGGCTCAGTTAGCTGCCTGCAGGCAAGTGGGGTCTTCCACAATCA  
GGGATCAAACAAGTAGTGTCCCCTGCCTTGCAAGGTGAATTCTTAACCACTGACCCACTAGAGAA  
GCCCCTGTCCAGAGCACTTTTGAGTGCCTTTTCCCTGCGTGTAGATCAAACCTCAGGGCCTTTGCAC  
GTGCGCTTCCGTGTCACTCAGGACTCTGTTCCCTCTGTGCGCCACATTGGGAAGGTCTTCCCTGTACA  
GCCTGCCCCCACCCTCACCTCCCACCTTCACTCTTGGCCCCCTTCCCTGGGCTTTCTTTTTCTTTAC  
AGCACTTATCTTCACTTTGTATATTATCTATTTCTTTGTCTCTCGCTGTTCCCTCAACAGAACGCAAGC  
CCCCTGAGAGTGCATCAGCCAGTGTTACATCTTTAAAACTTAACACGGTTCTCGGAACACAGGAG  
GGACTCAGTGTGTGTTGAGTGAATGCATGAATGCATTTGCTTTTTATGAAAACCCTTGGGGCAAAG  
GTACTGTTAATGCCGTATGTGGGAGTAGGAACCAGAGTCAGATGACTGAAGACAATTACTCAAG  
GTCACAAGCTGGGATGTGACTGAGCCCTGAATTGAGTTGGCTCTTCTGGGTCCCTGGACAGCCAC  
CTCCCAGGCTTACAGAGCCCAAGAGAGCCTCTGTAGGTCCTTTGGAAATTCTCAGAAAAGGCCAC  
AGTCTTCAGCAGGAAGTGGCACACGAGGTGCACAGAATGGAGTGGAAATTTAAGAGCTATGGAG  
CAAGGATTTCCCTGTGACCTGAGATGGAAAACAGGAAATAAATGAAACCTGGAAAAACAGTGGTG  
GAAGAGACTTGCAGTGATCAGGGAGGGCGGCAGTGGAGGGAGGGAGGGTGACGCAATGGAAGT  
GGCTGCAGGAGGTCGTAAACCCGGAGGAATCCCTCCACAGGATGTCTTAGGAGCCTGTGATGGAC  
GCAGAGCCCCTGGTCCCCTCAGGCTGTTCCGTGCATTTCCCCCACCCTAGTATGCCCAGATGT  
CTCTCTGCAGAGGATTTAGCAGTCCAGAGGAGGAGGGGCAGTACCCTGCGACCATGAACTCTTGA  
GTGCTGTGCTCAGGAGAAAACCACAGATACCCCAAGTCCCCTGGATCTGACTGTGGGGTGCGTGC  
TGCGACTTTTCTGTGGGAGGCAGTACTTGTATGGATGGGGAATCAGGGTGTCTTCCATTTGTGAAA  
ACAAGTTGGCAGAAAAAGGAAGCCGGTGGTGGCGCCAGAAACCTCACTCAGGATTATCAACTTG  
GCTAGTACTGGTGGTCACAGAGCATCAGGTGCTGATGTGAGGAGGTCAGGACTGGAATCCAGAGG  
CTCCCGGGCCACCTCCTGTTCCCTGATCCTGGGCTTGCTTTCCGTGCATGTTTTAACGCAGCCTCAAG  
TCCTGCCTGTAGACTTTCCTACCTGTTCCGTGCCGGCTCTCCAGAGACCCACAGCCAGAACCTCCT  
CCGAGAGGCTCCGGGGGACTTGTCTTGGCAACAGCACACAGACCACATGTGCTGTGGGGCTGA  
GGGCTTTCAGAAATTTTCGGGGGAGAGAGAGGTGACTGCTAAGCCCAGTGCATCAGAGCACAGGA  
GGGGGAGAGTGGCCTGGGGATTGAAGAGAAAGCATGTGAGGACCCCCGCCCCCATCTCTGCACCT  
GGGGCCCCAAGCCAGGCCTCGCCCTTAGGGTCCTCAGAAAGAGGCCCTTAGCCCCATGGGTGGGT  
GGACGCCCCAGGGTGAGTTAGAAGCCCGGGATGCCGCTCGAATTCCCAGACTCTGCGTGGGACTG  
AAGAAGGACTTTTAAAACTAGAGCTGACAGGTCAAAATAAACGCCCTCCATCGTGAGGAGCAGCC  
GCATTTGGGCCTCTGCGGCTGCCTCTCTAACAACACCCTTCATTCAGTGTCCGCTTCATGACCCACG  
CCTGGCTCCACGCAGCTCTCCTCACCGTGCTCCCCCGCTCTTGCCAGCGGCCTCCTTCCCGTCTCA  
CCGGCCTGGCCTTGTGACTGGAGTGGCCAAGACTCGCCTTAGGGTGCGCCCTGCGGAGACGCAGC  
AAGGGAGACAGGGTTCTTGTCTGAAGGCGCCCTCGGGCTGGGGGAGTTAGTGGGAGCATGTGGG  
AGTGTGTGTGTGAGTCTGTATGTGAGTGTAAGTCTGTGTGTGAGTGTGTACATGATTGTGTATGTGA  
GTCTATATGTGAGTGTAAAGTCTGTGTGTGAGTGTG
